# Supplementary figures and images for: Efficacy of early prone position for COVID-19 patients with severe hypoxia: a single-center prospective cohort study
Source: Springer Nature journal article supplement (doi:10.1007/s00134-020-06182-4), 2020-07-22

# Figure S1

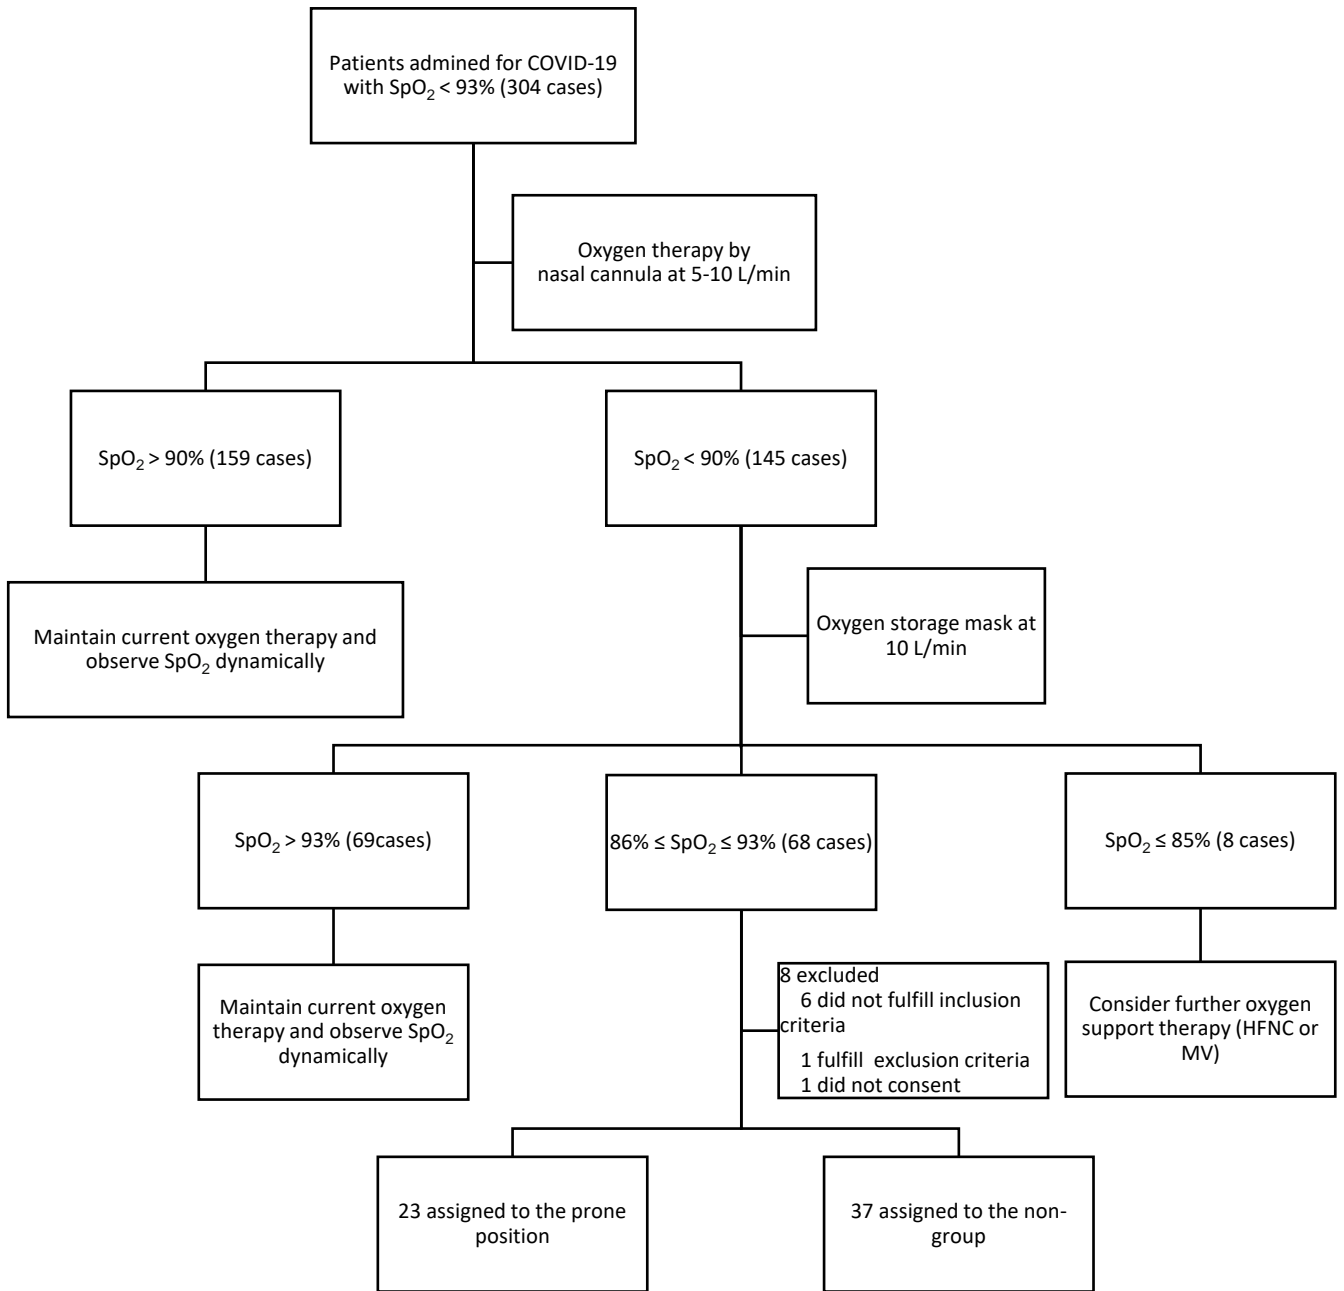

Supplement: MOESM1 [file 18205578]
